# Supplementary material for: Activin A Inhibits MPTP and LPS-Induced Increases in Inflammatory Cell Populations and Loss of Dopamine Neurons in the Mouse Midbrain In Vivo
Source: PLoS One. 2017 Jan 25;12(1):e0167211. doi: 10.1371/journal.pone.0167211 (PMC5266209; doi:10.1371/journal.pone.0167211)
Supplement: S1 Dataset — N/A = result not available due to insufficient tissue. (XLSX) [file pone.0167211.s002.xlsx]

## Sheet: Fig 1
Subject	Drug	Lesion	Value (TH)	Value (NeuN)
1	PBS	Saline	6290	7927
2	PBS	Saline	6476	7701
3	PBS	Saline	5494	8137
4	PBS	Saline	6687	8296
5	PBS	Saline	7830	8456
6	Activin A	Saline	7160	8244
7	Activin A	Saline	8730	9007
8	Activin A	Saline	6359	8122
9	Activin A	Saline	7852	8190
10	Activin A	Saline	6204	7145
11	PBS	MPTP	5053	5156
12	PBS	MPTP	4093	5288
13	PBS	MPTP	4707	5101
14	PBS	MPTP	4535	5006
15	PBS	MPTP	4983	6006
16	Activin A	MPTP	6176	5869
17	Activin A	MPTP	6486	7814
18	Activin A	MPTP	6813	8057
19	Activin A	MPTP	6242	8654
20	Activin A	MPTP	6867	8417

## Sheet: Fig 2
				Raw values (nmol/L)				Total catecholamine (nmol)				Total catecholamine (ng)				Standardized for protein (ng/ug)
Subject	Drug	Lesion	Protein (ug)	NE	DA	DOPAC	HVA	NE	DA	DOPAC	HVA	NE	DA	DOPAC	HVA	NE	DA	DOPAC	HVA	DA/HVA
1	PBS	Saline	4.60491	626.299	1255.77	153.165	150.284	0.313149	0.627885	0.0765825	0.075142	64.3961	119.047	12.8735	13.6909	13.9842	25.8522	2.79561	2.9731	8.69536
2	PBS	Saline	5.47962	546.295	1957.82	189.719	194.054	0.273147	0.978912	0.0948595	0.097027	56.1701	185.602	15.9459	17.6783	10.2507	33.8712	2.91003	3.22619	10.4988
3	PBS	Saline	4.53718	689.13	1921.47	177.996	206.76	0.344565	0.960736	0.088998	0.10338	70.8563	182.156	14.9606	18.8358	15.6168	40.1473	3.29733	4.15144	9.67069
4	PBS	Saline	8.32554	1020.14	2191.42	194.68	292.328	0.510073	1.09571	0.09734	0.146164	104.891	207.746	16.3629	26.6311	12.5987	24.9529	1.96538	3.19872	7.8009
5	PBS	Saline	5.09772	606.557	1701.64	177.957	210.675	0.303279	0.850819	0.0889785	0.105338	62.3662	161.315	14.9573	19.1925	12.2341	31.6446	2.93412	3.76492	8.40512
6	Activin A	Saline	5.73682	1359.36	1696.91	167.371	218.08	0.679678	0.848457	0.0836855	0.10904	139.769	160.868	14.0675	19.8671	24.3635	28.0413	2.45215	3.46309	8.09719
7	Activin A	Saline	5.77698	768.704	1616.58	162.148	150.564	0.384352	0.808289	0.081074	0.075282	79.0381	153.252	13.6285	13.7164	13.6816	26.528	2.35911	2.37432	11.1729
8	Activin A	Saline	6.19545	1781.33	1762.19	163.48	161.837	0.890666	0.881097	0.08174	0.0809185	183.157	167.056	13.7405	14.7434	29.5631	26.9643	2.21784	2.37971	11.3309
9	Activin A	Saline	8.13309	1167.24	2169.47	177.699	218.433	0.583618	1.08474	0.0888495	0.109216	120.015	205.666	14.9356	19.8992	14.7564	25.2876	1.8364	2.4467	10.3354
10	Activin A	Saline	4.92266	1017.98	1999.83	183.371	201.131	0.508989	0.999915	0.0916855	0.100566	104.669	189.584	15.4123	18.323	21.2626	38.5125	3.13089	3.72218	10.3468
11	PBS	MPTP	8.39149	953.458	367.042	55.439	103.109	0.476729	0.183521	0.0277195	0.0515545	98.0346	34.7956	4.65965	9.39323	11.6826	4.14653	0.555282	1.11938	3.70433
12	PBS	MPTP	5.57495	447.397	325.99	61.353	71.055	0.223698	0.162995	0.0306765	0.0355275	46.0014	30.9039	5.15672	6.47311	8.25144	5.54335	0.924981	1.16111	4.77419
13	PBS	MPTP	6.8795	390.909	263.103	41.527	54.832	0.195455	0.131552	0.0207635	0.027416	40.1933	24.9422	3.49034	4.9952	5.84247	3.62558	0.507355	0.726099	4.99323
14	PBS	MPTP	3.93165	627.786	262.386	60.632	74.663	0.313893	0.131193	0.030316	0.0373315	64.549	24.8742	5.09612	6.8018	16.4178	6.32665	1.29618	1.73001	3.657
15	PBS	MPTP	4.97362	482.496	203.793	54.93	73.108	0.241248	0.101897	0.027465	0.036554	49.6102	19.3196	4.61687	6.66014	9.97468	3.88441	0.928272	1.33909	2.90078
16	PBS	MPTP	4.64509	741.716	287.23	49.536	80.431	0.370858	0.143615	0.024768	0.0402155	76.2632	27.2294	4.1635	7.32726	16.418	5.86198	0.896323	1.57742	3.71618
17	PBS	MPTP	9.42146	854.889	353.769	77.787	94.186	0.427445	0.176885	0.0388935	0.047093	87.8997	33.5373	6.538	8.58034	9.32973	3.55967	0.693948	0.910724	3.90862
18	Activin A	MPTP	7.46883	1917.75	507.985	74.851	101.494	0.958877	0.253993	0.0374255	0.050747	197.183	48.157	6.29123	9.2461	26.4008	6.44773	0.842331	1.23796	5.20835
19	Activin A	MPTP	4.62829	1028.41	244.086	54.091	74.317	0.514205	0.122043	0.0270455	0.0371585	105.741	23.1394	4.54635	6.77028	22.8467	4.99955	0.982295	1.4628	3.41778
20	Activin A	MPTP	8.55815	1223.25	335.727	54.062	76.374	0.611627	0.167863	0.027031	0.038187	125.775	31.8269	4.54391	6.95767	14.6965	3.7189	0.530946	0.812988	4.57436
21	Activin A	MPTP	5.94124	1500.3	480.622	77.25	109.843	0.750152	0.240311	0.038625	0.0549215	154.261	45.563	6.49286	10.0067	25.9645	7.66893	1.09285	1.68428	4.55325
22	Activin A	MPTP	7.71462	1764.13	429.356	63.283	99.849	0.882066	0.214678	0.0316415	0.0499245	181.388	40.7029	5.31894	9.09624	23.5122	5.27608	0.689462	1.17909	4.4747

## Sheet: Fig 3
Ser 31
Subject
GEL 1	Drug	Lesion	Raw Value (Ser 31)	Raw Value (TH)	Raw Value (GAPDH)	Ser 31 Standardised to GAPDH	TH Standardised to GAPDH	Ser31/TH	Ratio
1	PBS	Saline	4197.74	9458.81	10853.4	0.386766	0.871504	0.443792	0.467525
2	PBS	Saline	6916.47	9065.35	12153.7	0.569084	0.745893	0.762957	0.80376
3	PBS	Saline	8478.78	8932.23	8328.56	1.01804	1.07248	0.949235	1
4	Activin A	Saline	7290.15	11921.1	12918.8	0.564308	0.922773	0.611535	0.64424
5	Activin A	Saline	6997.71	9274.54	12061.9	0.58015	0.768912	0.754508	0.794859
6	Activin A	Saline	7597.49	9081.54	5896.35	1.28851	1.5402	0.836586	0.881326
7	PBS	MPTP	535.577	541.284	10660.7	0.0502384	0.0507737	0.989457	1.04237
8	PBS	MPTP	589.456	5916.88	11850.7	0.0497403	0.499286	0.0996227	0.104951
9	PBS	MPTP	1201.18	5693.76	10398.9	0.115511	0.547535	0.210965	0.222247
10	Activin A	MPTP	122.607	1255.65	10653	0.0115092	0.117869	0.0976444	0.102866
11	Activin A	MPTP	1135.18	7230.05	11965.7	0.09487	0.604233	0.157009	0.165406
12	Activin A	MPTP	2002.2	7183.18	10289.4	0.194588	0.698111	0.278735	0.293642
GEL 2
13	PBS	Saline	6575.2	9015.64	13672.6	0.480903	0.659394	0.72931	0.995252
14	PBS	Saline	6072.4	13949.3	9090.42	0.668	1.53451	0.435318	0.594056
15	PBS	Saline	8078.07	11023.7	11977.6	0.67443	0.92036	0.73279	1
16	Activin A	Saline	6598.3	9790.66	11669.5	0.56543	0.838995	0.673938	0.919688
17	Activin A	Saline	6875.86	13199.8	10523.3	0.653396	1.25434	0.520907	0.710855
18	Activin A	Saline	8465.4	11972.9	11811.9	0.716681	1.01363	0.707046	0.96487
19	PBS	MPTP	419.263	5983.3	12276.3	0.0341523	0.487387	0.0700722	0.095624
20	PBS	MPTP	242.042	3922.74	9440.29	0.0256393	0.415532	0.0617023	0.0842019
21	PBS	MPTP	986.284	6400.59	9588.2	0.102864	0.667549	0.154093	0.210282
22	Activin A	MPTP	237.971	7158.76	10788.3	0.0220583	0.663569	0.0332419	0.0453635
23	Activin A	MPTP	131.213	1251.72	9881.68	0.0132784	0.126671	0.104826	0.143051
24	Activin A	MPTP	558.749	5122.86	5371.3	0.104025	0.953748	0.10907	0.148842
Ser 40
Subject
GEL 1	Drug	Lesion	Raw Value (Ser 40)	Raw Value (TH)	Raw Value (GAPDH)	Ser 40 Standardised to GAPDH	TH Standardised to GAPDH	Ser40/TH	Ratio
1	PBS	Saline	6309.15	13217.4	4795.2	1.31572	2.75637	0.477338	1
2	PBS	Saline	5291.79	11660.2	5395.33	0.98081	2.16118	0.453832	0.950755
3	PBS	Saline	4586.91	11392.2	8057.1	0.5693	1.41393	0.402636	0.843503
4	Activin A	Saline	6795.64	13203.2	10120.6	0.671467	1.30459	0.514695	1.07826
5	Activin A	Saline	4905.2	12278.9	65789.2	0.0745594	0.18664	0.399482	0.836896
6	Activin A	Saline	5868.2	12317.6	11779	0.498192	1.04573	0.476408	0.998051
7	PBS	MPTP	5883.57	2502.55	10406.1	0.565398	0.240489	2.35103	4.9253
8	PBS	MPTP	577.749	3916.81	4219.91	0.13691	0.928174	0.147505	0.309016
9	PBS	MPTP	3673.72	4791.91	9438.76	0.389216	0.507684	0.76665	1.60609
10	Activin A	MPTP	4192.26	3015.2	6985.47	0.600139	0.43164	1.39037	2.91276
11	Activin A	MPTP	3305.26	6100.52	3927.62	0.841542	1.55324	0.541799	1.13504
12	Activin A	MPTP	6499.2	6494.35	11434.7	0.568375	0.56795	1.00075	2.09652
GEL 2
13	PBS	Saline	10823.1	12465.3	11909.1	0.908809	1.04671	0.868255	1
14	PBS	Saline	7603.81	12503.6	5998.47	1.26763	2.08446	0.608132	0.700407
15	PBS	Saline	9204.76	12826.9	6858.64	1.34207	1.87018	0.717614	0.826501
16	Activin A	Saline	9731.25	13947.1	14571.4	0.66783	0.957153	0.697726	0.803595
17	Activin A	Saline	8628.52	11898.1	6108.93	1.41244	1.94766	0.7252	0.835238
18	Activin A	Saline	9630.23	11308.4	5906.47	1.63045	1.91457	0.851602	0.98082
19	PBS	MPTP	10311.3	6482.1	15033.2	0.685902	0.431185	1.59074	1.83211
20	PBS	MPTP	7379.74	3042.96	10443.4	0.706639	0.291375	2.42518	2.79317
21	PBS	MPTP	9293.88	4928.52	11784.7	0.788638	0.418212	1.88574	2.17187
22	Activin A	MPTP	5492.45	3797.86	10206.7	0.53812	0.372094	1.44619	1.66563
23	Activin A	MPTP	7225.57	1337.13	9099.66	0.794048	0.146943	5.40377	6.22372
24	Activin A	MPTP	7279.93	3993.98	4289.74	1.69706	0.931055	1.82273	2.0993
DAT
GEL 1	Drug	Lesion	Raw Value (DAT)	Raw Value (GAPDH)	Standardised to GAPDH	Ratio
1	PBS	Saline	14942.7	11341.4	1.31754	1
2	Activin A	Saline	14478.8	14678.5	0.9864	0.74867
3	PBS	MPTP	9225.86	14068.3	0.655789	0.497739
4	Activin A	MPTP	7486.8	5283.76	1.41695	1.07545
5	Activin A	MPTP	8557.43	14254	0.600351	0.455661
GEL 2
6	PBS	Saline	13885.6	14783.9	0.939241	0.44215
7	PBS	Saline	22302.4	10842.1	2.05701	0.968341
8	PBS	Saline	20936.5	9855.9	2.12426	1
9	Activin A	Saline	15468.1	14712.5	1.05136	0.494932
10	Activin A	Saline	21238.3	11046.9	1.92255	0.905047
11	Activin A	Saline	23062.1	7386.07	3.12238	1.46987
12	PBS	MPTP	8397.02	8607.3	0.97557	0.459252
13	PBS	MPTP	8121.48	10616.3	0.765003	0.360127
14	PBS	MPTP	13866.2	5664.76	2.44779	1.1523
15	Activin A	MPTP	8483.85	2658.33	3.19143	1.50237
16	Activin A	MPTP	2818.54	11377.4	0.247732	0.11662
17	Activin A	MPTP	10399.4	10548.1	0.985896	0.464113
GEL 3
18	PBS	Saline	31897	14146.5	2.25477	1
19	PBS	Saline	33495.8	15118.2	2.2156	0.982629
20	Activin A	Saline	31649.1	10972.6	2.88438	1.27924
21	Activin A	Saline	29663.3	12808	2.31599	1.02715
22	PBS	MPTP	36409.1	13581.5	2.6808	1.18895
23	PBS	MPTP	2705.46	8925.92	0.303101	0.134427
24	Activin A	MPTP	17087.2	14084.8	1.21316	0.538045
25	Activin A	MPTP	4215.41	13054.4	0.32291	0.143212

## Sheet: Fig 4
Subject	Drug	Lesion	Value (TH)	Value (Neun)
1	PBS	Saline	6966	7767
2	PBS	Saline	7310	7970
3	PBS	Saline	6778	8882
4	PBS	Saline	6929	7426
5	PBS	Saline	7971	8543
6	Activin A	Saline	7399	8249
7	Activin A	Saline	7005	8585
8	Activin A	Saline	8334	8747
9	Activin A	Saline	7513	8434
10	Activin A	Saline	5950	7036
11	PBS	MPTP	4289	5572
12	PBS	MPTP	4515	5627
13	PBS	MPTP	4121	5090
14	PBS	MPTP	6856	5780
15	PBS	MPTP	4754	5776
16	PBS	MPTP	4487	N/A
17	Activin A	MPTP	7631	8328
18	Activin A	MPTP	5469	6777
19	Activin A	MPTP	6510	7832
20	Activin A	MPTP	6054	7767
21	Activin A	MPTP	8249	8389
				Raw values (nmol/L)				Total catecholamine (nmol)				Total catecholamine (ng)				Standardized for protein (ng/ug)
Subject	Drug	Lesion	Protein (ug)	NE	DA	DOPAC	HVA	NE	DA	DOPAC	HVA	NE	DA	DOPAC	HVA	NE	DA	DOPAC	HVA	DA/HVA
1	PBS	Saline	6.30678	369.216	890.154	93.794	120.541	0.184608	0.445077	0.046897	0.0602705	37.9628	84.3866	7.88339	10.9813	6.01937	13.3803	1.24999	1.74119	7.68458
2	PBS	Saline	8.32609	58.474	2274.84	150.927	210.636	0.029237	1.13742	0.0754635	0.105318	6.0123	215.655	12.6854	19.1889	0.722104	25.9011	1.52357	2.30468	11.2385
3	PBS	Saline	6.68721	109.614	1870.39	164.089	209.488	0.054807	0.935195	0.0820445	0.104744	11.2705	177.313	13.7917	19.0844	1.68538	26.5152	2.0624	2.85386	9.29101
4	PBS	Saline	7.39493	136.039	1686.92	114.226	159.658	0.0680195	0.84346	0.057113	0.079829	13.9875	159.92	9.6007	14.5448	1.8915	21.6256	1.29828	1.96687	10.995
5	PBS	Saline	2.07127	256.8	1547.04	112.501	145.527	0.1284	0.77352	0.0562505	0.0727635	26.4042	146.659	9.45571	13.2575	12.7478	70.8066	4.56518	6.40067	11.0624
6	Activin A	Saline	3.1425	160.677	1400.91	121.891	140.503	0.0803385	0.700456	0.0609455	0.0702515	16.5208	132.806	10.2449	12.7998	5.25722	42.2614	3.26012	4.07313	10.3756
7	Activin A	Saline	7.60507	168.022	1185.89	97.9	140.833	0.084011	0.592946	0.04895	0.0704165	17.276	112.422	8.2285	12.8299	2.27164	14.7826	1.08197	1.68702	8.76255
8	Activin A	Saline	5.87801	429.246	1354.07	164.741	199.523	0.214623	0.677037	0.0823705	0.0997615	44.1351	128.366	13.8465	18.1765	7.50851	21.8384	2.35564	3.0923	7.06219
9	Activin A	Saline	9.8442	366.265	1758.69	152.838	182.475	0.183133	0.879345	0.076419	0.0912375	37.6594	166.724	12.846	16.6235	3.82554	16.9362	1.30493	1.68866	10.0294
10	Activin A	Saline	5.88043	434.868	2313.93	232.282	286.531	0.217434	1.15697	0.116141	0.143266	44.7131	219.361	19.5233	26.103	7.60371	37.3035	3.32004	4.43895	8.40368
11	PBS	MPTP	8.34663	409.987	827.042	85.341	150.304	0.204994	0.413521	0.0426705	0.075152	42.1549	78.4036	7.17291	13.6927	5.05052	9.39344	0.859378	1.64051	5.72594
12	PBS	MPTP	8.45895	406.943	883.602	86.557	144.473	0.203471	0.441801	0.0432785	0.0722365	41.8419	83.7655	7.27512	13.1615	4.94646	9.90259	0.86005	1.55592	6.36444
13	PBS	MPTP	4.07246	403.863	1130.7	139.089	190.458	0.201932	0.56535	0.0695445	0.095229	41.5252	107.19	11.6904	17.3507	10.1966	26.3208	2.8706	4.2605	6.17786
14	PBS	MPTP	0.330906	304.917	637.134	63.386	80.661	0.152458	0.318567	0.031693	0.0403305	31.3516	60.4003	5.32759	7.34822	94.7447	182.53	16.1	22.2064	8.21972
15	PBS	MPTP	3.75605	391.893	558.854	76.41	141.979	0.195946	0.279427	0.038205	0.0709895	40.2944	52.9794	6.42226	12.9343	10.7279	14.1051	1.70984	3.44359	4.09604
16	Activin A	MPTP	5.08214	326.738	523.07	52.333	69.58	0.163369	0.261535	0.0261665	0.03479	33.5952	49.587	4.39859	6.33874	6.61045	9.75712	0.8655	1.24726	7.82286
17	Activin A	MPTP	7.25844	381.372	1085.74	102.08	142.99	0.190686	0.542871	0.05104	0.071495	39.2127	102.928	8.57982	13.0264	5.40235	14.1805	1.18205	1.79465	7.90153
18	Activin A	MPTP	5.39493	168.25	593.784	55.098	96.174	0.084125	0.296892	0.027549	0.048087	17.2995	56.2907	4.63099	8.76145	3.20662	10.434	0.858396	1.62402	6.42482
DAT
GEL 1
Subject	Drug	Lesion	Raw Value (DAT)	Raw Value (GAPDH)	Standardised to GAPDH	Ratio
1	PBS	Saline	16642.6	15399.7	1.08071	0.714783
2	PBS	Saline	20872.4	13805	1.51194	1
3	PBS	Saline	25140.5	19078.6	1.31773	0.871548
4	Activin A	Saline	28198	15491.4	1.82024	1.20391
5	Activin A	Saline	18637.2	14135	1.31852	0.872069
6	Activin A	Saline	17385.5	17978.9	0.966992	0.639569
7	PBS	MPTP	7572.58	16079.3	0.470951	0.311487
8	PBS	MPTP	5657.63	15612.4	0.36238	0.239678
9	PBS	MPTP	1911.38	12174.2	0.157002	0.103841
10	Activin A	MPTP	10243	15641	0.654881	0.433138
11	Activin A	MPTP	11616.3	17942.7	0.647414	0.4282
12	Activin A	MPTP	5203.85	15287.2	0.340407	0.225145
GEL 2
13	PBS	Saline	19224.3	11071	1.73646	0.89775
14	PBS	Saline	27660.9	14300.7	1.93424	1
15	PBS	Saline	11057.9	18011	0.613955	0.317414
16	Activin A	Saline	9833.43	9844.7	0.998855	0.516408
17	Activin A	Saline	23967.3	17609.5	1.36105	0.703661
18	Activin A	Saline	12972.3	19034.8	0.681503	0.352337
19	PBS	MPTP	13168	7034.8	1.87184	0.967741
20	PBS	MPTP	10088.4	18755.8	0.53788	0.278084
21	PBS	MPTP	9533.19	18470.1	0.516141	0.266844
22	Activin A	MPTP	18123.1	12151.7	1.49141	0.771057
23	Activin A	MPTP	7527.29	19405.9	0.387887	0.200538
24	Activin A	MPTP	6566.75	14938.2	0.439593	0.22727
GEL 3
25	PBS	Saline	7084.99	9438.6	0.75064	0.351454
26	PBS	Saline	19145	8963.77	2.13581	1
27	PBS	Saline	17883	16771.5	1.06628	0.499237
28	Activin A	Saline	19044.8	11131	1.71097	0.801083
29	Activin A	Saline	25841.2	9448.6	2.73493	1.28051
30	Activin A	Saline	12204.3	14615.6	0.835018	0.39096
31	PBS	MPTP	5156.9	11176	0.461426	0.216042
32	PBS	MPTP	12777.5	10562.5	1.20971	0.566392
33	PBS	MPTP	7846.89	12709.6	0.617398	0.289069
34	Activin A	MPTP	4327.54	7629.34	0.567223	0.265577
35	Activin A	MPTP	7854.77	10573.8	0.742851	0.347807
36	Activin A	MPTP	8840.89	12462.1	0.709423	0.332156
GEL 4
37	PBS	Saline	20470	14608.4	1.40125	0.782922
38	PBS	Saline	19540	13789.6	1.41701	0.791731
39	PBS	Saline	26523.5	14819.6	1.78976	1
40	PBS	Saline	21738.9	16837.4	1.29111	0.721383
41	Activin A	Saline	15491.1	15206.9	1.01869	0.569175
42	PBS	MPTP	14581.5	17177.3	0.84888	0.474297
43	PBS	MPTP	13874.6	14759.1	0.940069	0.525247
44	Activin A	MPTP	14316.9	18353.9	0.780046	0.435837
45	Activin A	MPTP	12410.3	14021.8	0.885076	0.494521
46	Activin A	MPTP	7621.82	12415.1	0.613917	0.343016

## Sheet: Fig 5
Subject	Drug	Lesion	Value (GFAP)	Value (Iba1)
1	PBS	Saline	3022.72	4245.83
2	PBS	Saline	1700.6	2990.79
3	PBS	Saline	3018.49	4455.43
4	PBS	Saline	N/A	3757.64
5	Activin A	Saline	3118.09	4462.21
6	Activin A	Saline	2181.98	2441.99
7	Activin A	Saline	1486.58	3030.95
8	PBS	MPTP	5862.48	11043.7
9	PBS	MPTP	6177.18	10357.7
10	PBS	MPTP	4306.16	9115.05
11	PBS	MPTP	6059.02	12839.5
12	Activin A	MPTP	5021.22	9882.21
13	Activin A	MPTP	4241.18	8610.51
14	Activin A	MPTP	3503.92	5505.32
15	Activin A	MPTP	2241.39	4721.03
Subject	Lesion	Value (GFAP)	Value (Iba1)	Value (TH)	Value (Neun)
1	PBS	1489.92	3651.71	7348	8550
2	PBS	1200.58	3068.35	6239	7739
3	PBS	1890.86	2369.69	7455	8165
4	PBS	1699.26	3076	7436	8351
5	PBS	N/A	3801.31	6398	7666
6	LPS	4514.18	4137.85	4950	5635
7	LPS	2444.56	5268.56	4048	5084
8	LPS	3572	5185.98	5271	6650
9	LPS	3788.01	6504.29	5612	7219
10	LPS	3351.72	6668.52	4825	5748
11	LPS + Activin A	2014.53	3282.27	7014	7632
12	LPS + Activin A	2412.08	3764.22	7107	7996
13	LPS + Activin A	2346.86	4101.66	5492	6329
14	LPS + Activin A	2586.9	2619.44	6790	7850
15	LPS + Activin A	N/A	5595.2	6310	7476
DAT
GEL 1
Subject	Lesion	Raw Value (DAT)	Raw Value (GAPDH)	Standardised to GAPDH	Ratio
1	PBS	31862.9	16966.4	1.878	0.755488
2	PBS	37926.5	15257.2	2.48581	1
3	LPS	34845.4	31395.2	1.1099	0.446493
4	LPS	34771.9	18917.9	1.83805	0.739416
5	LPS + Activin A	37950.8	26333.6	1.44116	0.579754
6	LPS + Activin A	27242.5	19346.2	1.40815	0.566477
GEL 2
7	PBS	13206	9725.46	1.35787	0.606889
8	PBS	29887.1	21232.4	1.40762	0.629123
9	PBS	29789.2	13314	2.23743	1
10	LPS	26151.2	16984.9	1.53967	0.688143
11	LPS	32760.4	20268.9	1.61629	0.722384
12	LPS	29596.5	14485.2	2.04322	0.913196
13	LPS + Activin A	26589.5	28837.7	0.92204	0.412097
14	LPS + Activin A	25664.5	10177.1	2.52179	1.12709
15	LPS + Activin A	28128.3	15222	1.84787	0.825888

## Sheet: S1 Fig
Subject	Lesion	Value (Striatum)	Value (midbrain)
1	Saline	32.5941	31.0739
2	Saline	37.0119	22.0796
3	Saline	68.5517	33.0142
4	Saline	31.4392	21.0802
5	Saline	26.6199	29.9828
6	Saline	26.5691	36.3039
7	Saline	52.4451	22.7926
8	Saline	19.0394	19.7683
9	Saline	61.0181	24.0888
10	Saline	21.5343	N/A
11	MPTP	39.17	20.7309
12	MPTP	45.5585	15.8164
13	MPTP	55.5058	12.8976
14	MPTP	50.7724	15.7218
15	MPTP	44.3857	7.18266
16	MPTP	35.1286	30.5026
17	MPTP	33.8071	20.1494
18	MPTP	33.779	14.1655
19	MPTP	46.3089	35.7264
20	MPTP	38.8655	10.401
21	MPTP	28.0889	22.6975
22	MPTP	34.6496	25.3267
23	MPTP + Activin A	192.036	210.219
24	MPTP + Activin A	205.466	134.59
25	MPTP + Activin A	223.363	302.23
26	MPTP + Activin A	918.57	189.227
27	MPTP + Activin A	167.843	62.5298
28	MPTP + Activin A	175.452	207.486
29	MPTP + Activin A	121.649	219.954
30	MPTP + Activin A	131.727	179.024
31	MPTP + Activin A	431.92	226.991
32	MPTP + Activin A	535.53	76.8186
33	MPTP + Activin A	124.903	30.5344
34	MPTP + Activin A	110.878	205.417
35	MPTP + Activin A	137.31	238.246
